# Supplementary material for: A functional screen for ubiquitin regulation identifies an E3 ligase secreted by Pseudomonas aeruginosa
Source: PubMed Central journal article supplement — bioRxiv. 2024 Sep 18:2024.09.18.613774. Preprint. [Version 1] doi: 10.1101/2024.09.18.613774 (PMC11430079; doi:10.1101/2024.09.18.613774), 2024-09-18
Supplement: NIHPP2024.09.18.613774V1-supplement-1.pdf [file NIHPP2024.09.18.613774V1-supplement-1.pdf]

## Fig S1. A functional screen for ubiquitin regulation

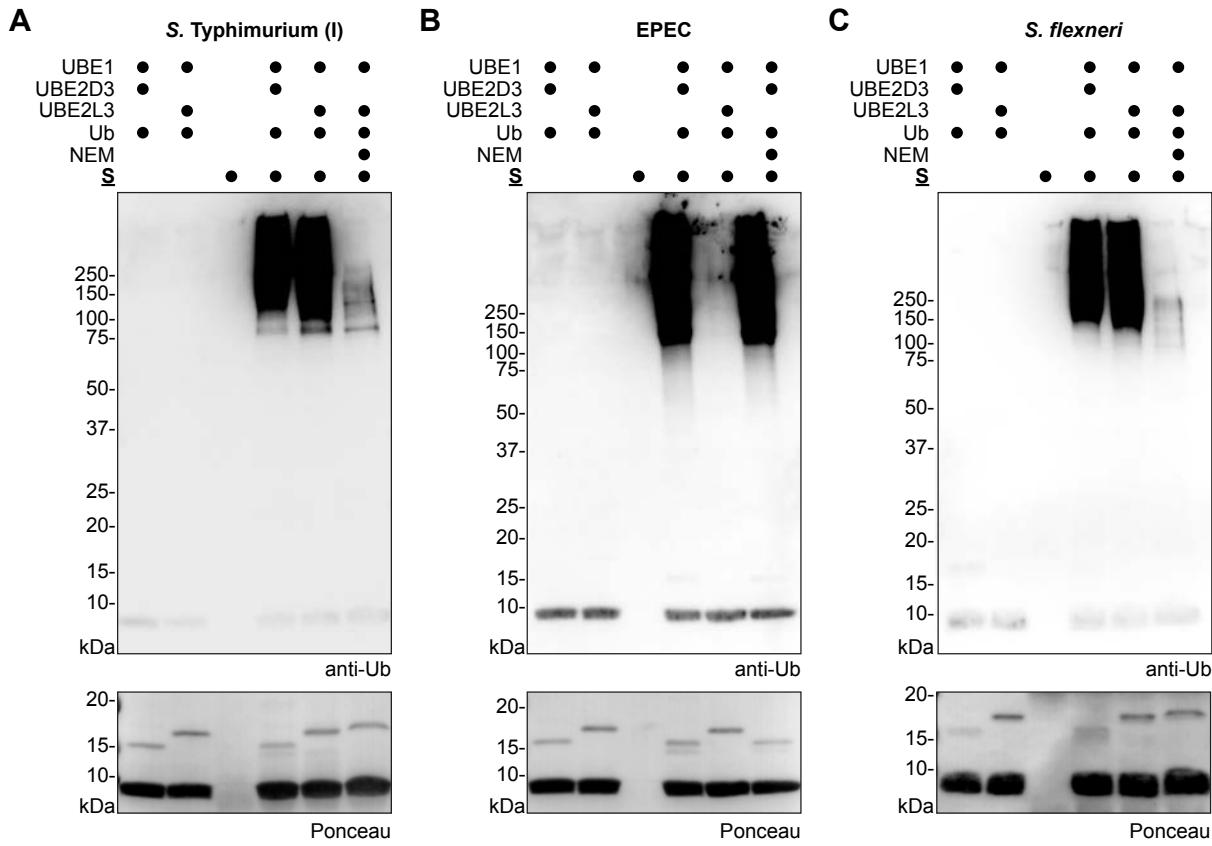

1057 **Supplementary Figure 1: A functional screen for ubiquitin regulation**

- 1058           A. E3 ligase assays combining the indicated reaction components with the SPI-I secreted  
1059           fraction from *S. Typhimurium*, with and without prior treatment with NEM.  
1060           Reactions were resolved by SDS-PAGE and visualized by anti-Ub western blot.
- 1061           B. As in **A**), for the secreted fraction from EPEC.
- 1062           C. As in **A**), for the secreted fraction from *S. flexneri*.
- 1063



1064 **Supplementary Figure 2: Detection of E3 ligase activity secreted by *P. aeruginosa***

- 1065           A. Silver-stained SDS-PAGE analysis of secreted fractions generated from the indicated  
1066           PA14 mutant strains, or in the absence of EGTA stimulation.
- 1067           B. Silver-stained SDS-PAGE analysis of secreted fractions generated from the indicated  
1068           *P. aeruginosa* clinical isolates.
- 1069           C. Representative FP traces monitoring the Tamra-Ub ligase substrate following  
1070           addition of secreted fractions from the indicated *P. aeruginosa* clinical isolates.  
1071



### Fig S3. Identification of a *P. aeruginosa* E3 ligase

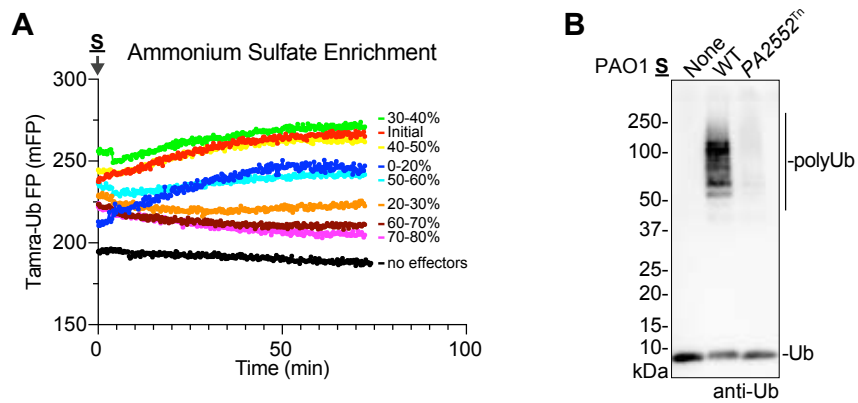

1072 **Supplementary Figure 3: Identification of a *P. aeruginosa* E3 ligase**

- 1073           A. Representative FP traces monitoring the Tamra-Ub ligase substrate following  
1074           addition of the indicated ammonium sulfate fractions of PA14 secreted protein.
- 1075           B. E3 ligase assays for secreted fractions generated from PAO1 wild-type or the  
1076           *PA2552<sup>Tn</sup>* mutant strain. Reactions were resolved by SDS-PAGE and visualized by  
1077           anti-Ub western blot.  
1078

## Fig S4. Characterization of PUL-1 E3 ligase activity

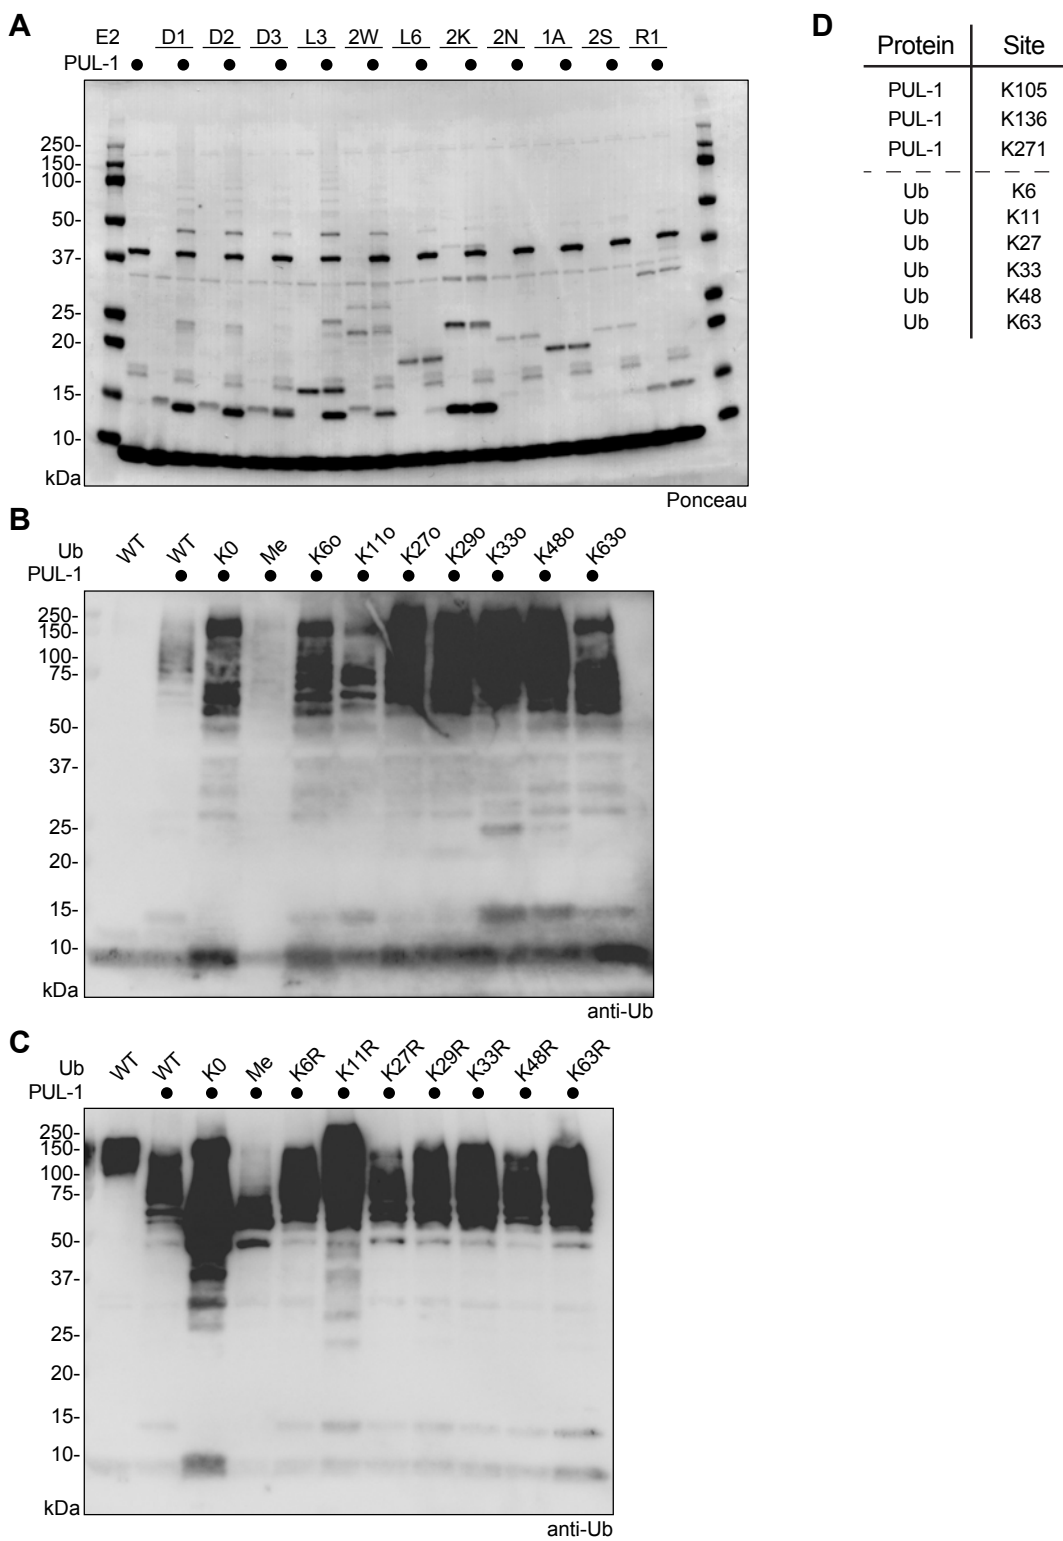

1079 **Supplementary Figure 4: Characterization of PUL-1 E3 ligase activity**

- 1080 A. E3 ligase assays for recombinant PUL-1 and the indicated panel of E2 enzymes.  
1081 Ponceau-stained visualization of **Figure 4D**.
- 1082 B. E3 ligase assays for recombinant PUL-1 and Lys-less (K0), methylated, or the  
1083 indicated panel of K-only Ub mutants. Reactions were resolved by SDS-PAGE and  
1084 visualized by anti-Ub western blot.
- 1085 C. E3 ligase assays for recombinant PUL-1 and Lys-less (K0), methylated, or the  
1086 indicated panel of K-to-R Ub mutants. Reactions were resolved by SDS-PAGE and  
1087 visualized by anti-Ub western blot.
- 1088 D. Ubiquitination sites identified by mass spectrometry following an *in vitro* PUL-1  
1089 ligase reaction.  
1090

## Fig S5. Structural analysis of the PUL-1 ligase fold

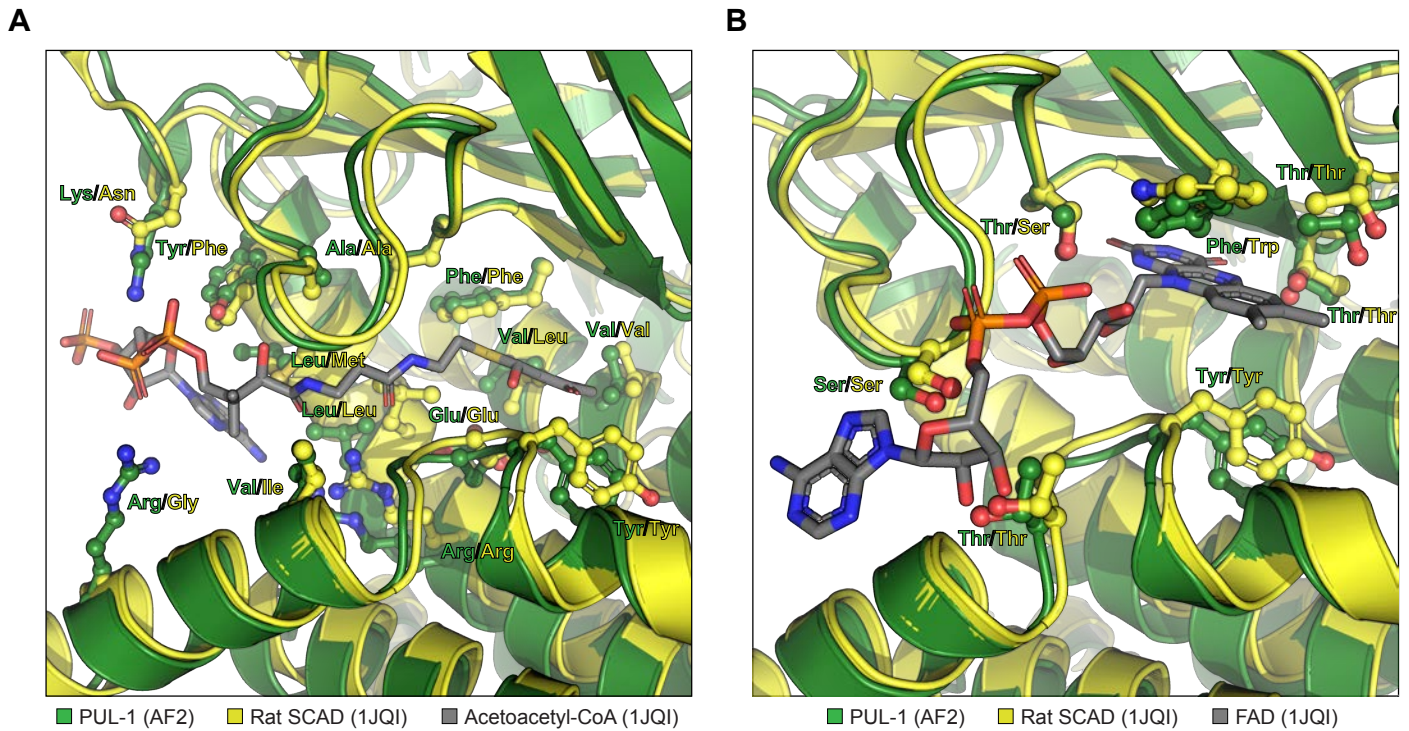

**C**

| Strain | PUL-1 sequence substitutions (relative to PAO1) |
|--------|-------------------------------------------------|
| PAO1   | -                                               |
| PA14   | A372V                                           |
| PA2-45 | None                                            |
| PA2-59 | None                                            |
| PA2-61 | E7D, T220A                                      |
| PA2-72 | None                                            |
| PA2-88 | None                                            |
| PA2-89 | None                                            |
| PA2-94 | None                                            |
| PA3-17 | None                                            |
| PA3-22 | None                                            |
| PA3-25 | None                                            |
| PA5-40 | None                                            |
| PAHP3  | None                                            |
| E2     | R260C                                           |
| JJ692  | None                                            |

**D**

|                                                     | Active site                             |
|-----------------------------------------------------|-----------------------------------------|
| <i>Pseudomonas aeruginosa</i> PAO1 NP_251242.1      | MIP---C <sup>EE</sup> EIQI              |
| <i>Pseudomonas aeruginosa</i> UCBPP-PA14 ABJ11732.1 | MIP---C <sup>EE</sup> EIQI              |
| <i>Acinetobacter baumannii</i> SST13011.1           | MIP---C <sup>EE</sup> EIQI              |
| <i>Pseudomonas otitidis</i> WP_165675478.1          | MIP---S <sup>ED</sup> DIQI              |
| <i>Pseudomonas alcaligenes</i> WP_203792207.1       | MLP---S <sup>EQ</sup> DLLI              |
| <i>Pseudomonas syringae</i> WP_004418511.1          | M <sup>H</sup> DLEL <sup>S</sup> EEQVMI |
| <i>Pseudomonas nitritireducens</i> WP_184593261.1   | MIP---S <sup>EE</sup> DIQI              |
| <i>Pseudomonas fluorescens</i> WP_039768646.1       | MIP---N <sup>DD</sup> QQQI              |
| <i>Pseudomonas putida</i> WP_019437599.1            | MLV---N <sup>DE</sup> QQQI              |

1091 **Supplementary Figure 5: Structural analysis of the PUL-1 ligase fold**

- 1092 A. Structural overlay of the mitochondrial short-chain specific acyl-CoA dehydrogenase  
1093 (SCAD) from rat (yellow, PDB: 1JQI), with acetoacetyl-CoA bound (grey sticks),  
1094 and the PUL-1 AlphaFold2 model (green). Residues within the acyl-CoA-binding  
1095 pocket are shown in ball-and-stick for both enzymes.
- 1096 B. Structural overlay of the mitochondrial short-chain specific acyl-CoA dehydrogenase  
1097 (SCAD) from rat (yellow, PDB: 1JQI), with FAD bound (grey sticks), and the PUL-1  
1098 AlphaFold2 model (green). Residues within the FAD-binding pocket are shown in  
1099 ball-and-stick for both enzymes.
- 1100 C. Conservation of PUL-1 orthologues among all *P. aeruginosa* clinical isolates  
1101 presented in **Figure 2F**. Amino acid substitutions relative to PAO1 are listed.
- 1102 D. Sequence alignment of PUL-1 orthologues, focused on the region surrounding Cys4  
1103 of PAO1.  
1104

## Fig S6. PUL-1 ligase activity modulates *P. aeruginosa* virulence

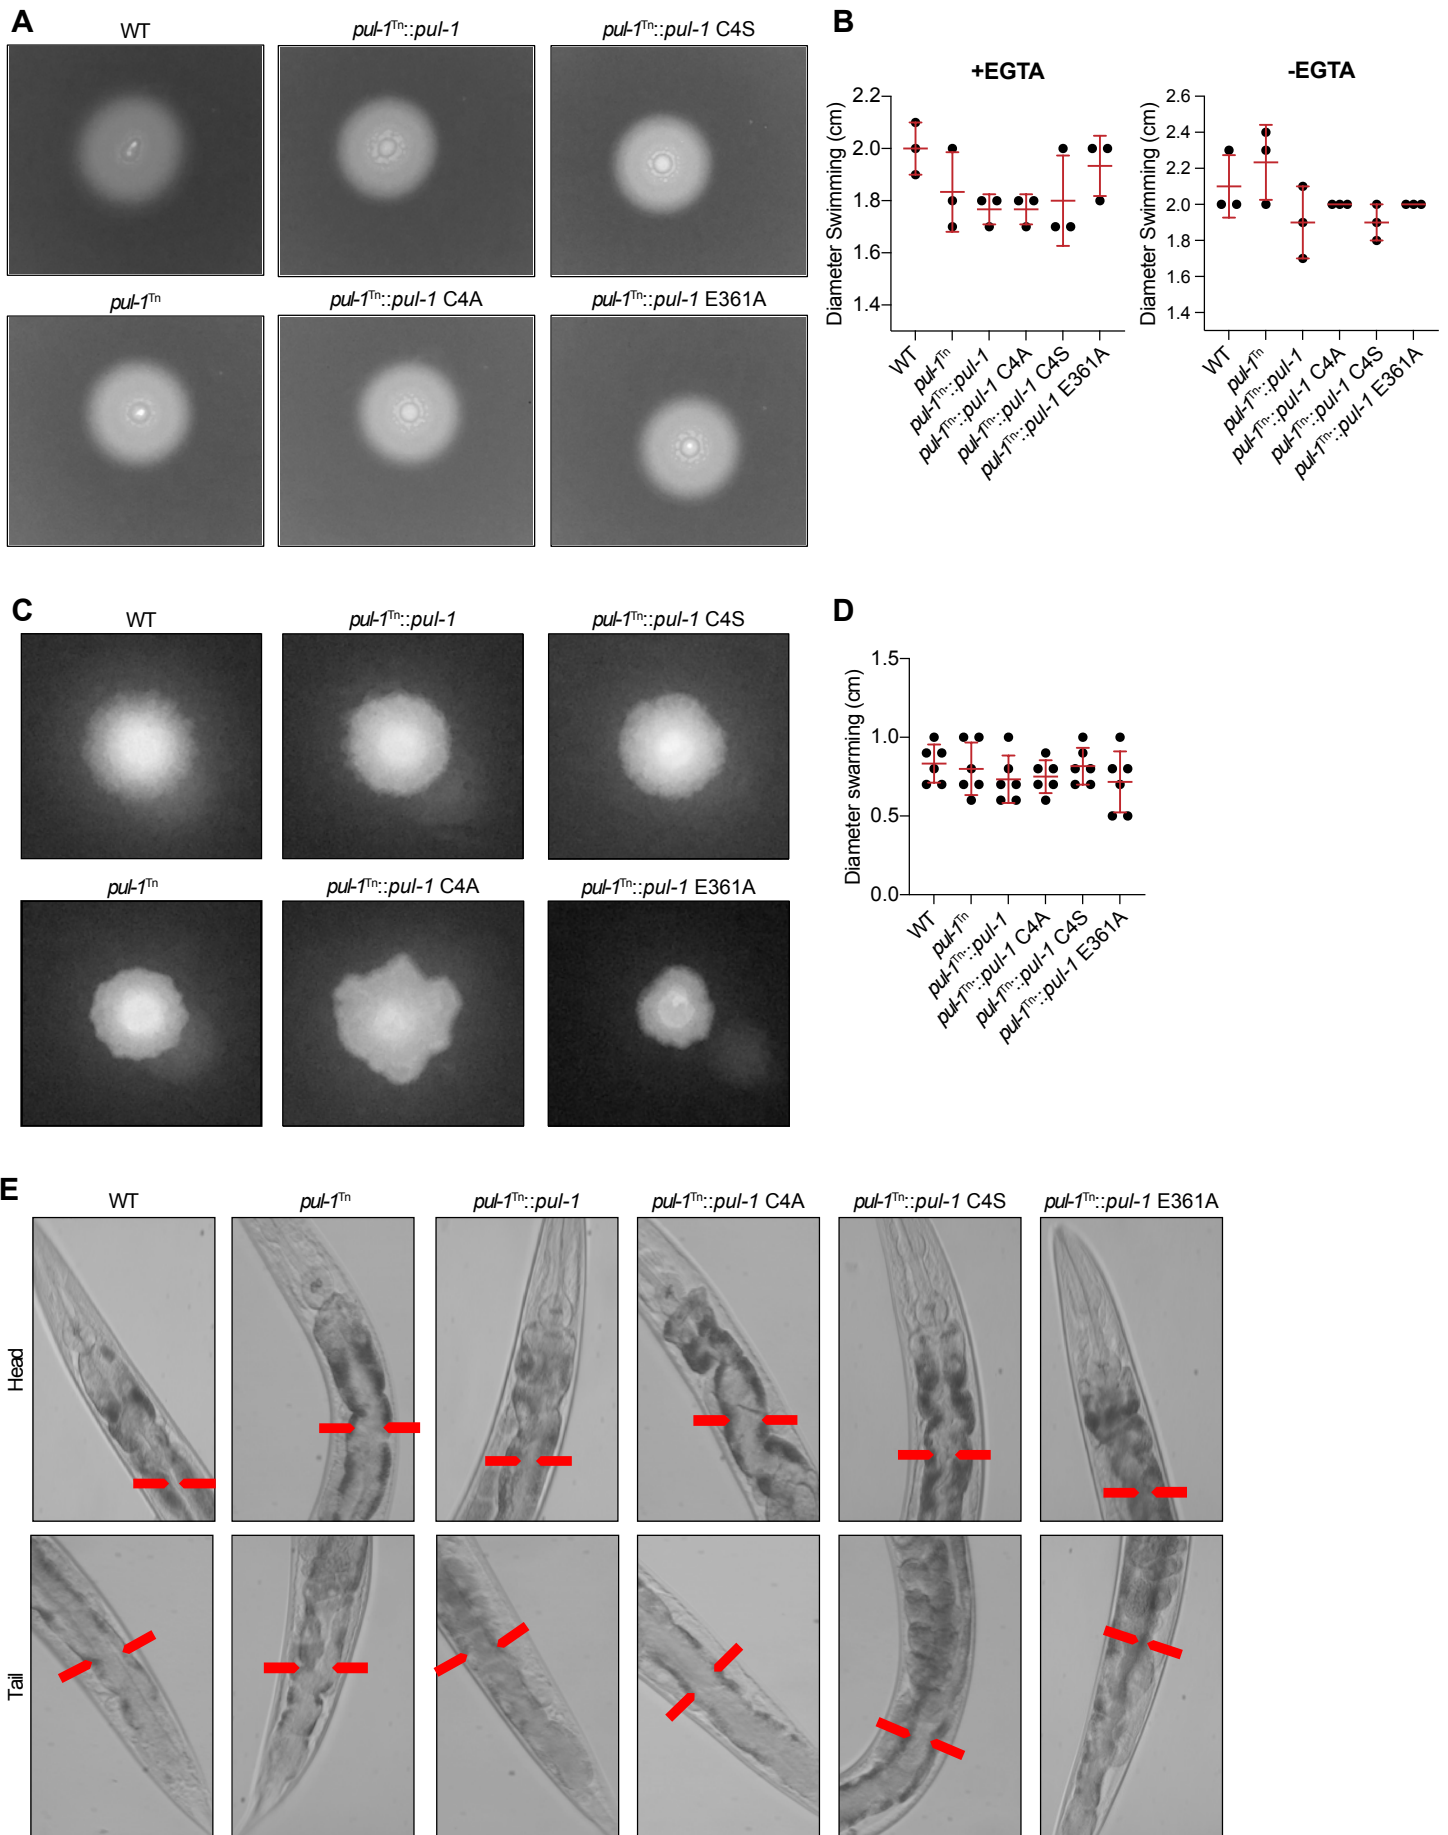

1105 **Supplementary Figure 6: PUL-1 ligase activity modulates *P. aeruginosa* virulence**

1106 A. Representative images of *P. aeruginosa* swimming for WT PAO1 and the indicated  
1107 *pul-I*<sup>Tn</sup> mutant strains.

1108 B. Quantification of **A**), under conditions with and without EGTA. Mean values and  
1109 standard deviation are indicated in red.

1110 C. Representative images of *P. aeruginosa* swarming for WT PAO1 and the indicated  
1111 *pul-I*<sup>Tn</sup> mutant strains.

1112 D. Quantification of **C**). Mean values and standard deviation are indicated in red.

1113 E. Representative images of *C. elegans* intestinal bloating near the head and tail,  
1114 following infection with WT PAO1 or the indicated *pul-I*<sup>Tn</sup> mutant strains. The  
1115 intestinal lumen diameter is indicated by black arrows.

1116
